# Supplementary material for: Delivering safe and effective test-result communication, management and follow-up: a mixed-methods study protocol
Source: PubMed Central journal article supplement — BMJ Open. 2018 Feb 15;8(2):e020235. doi: 10.1136/bmjopen-2017-020235 (PMC5829886; doi:10.1136/bmjopen-2017-020235), 2018-02-15
Supplement: bmjopen-2017-020235.reviewer_comments.pdf [file bmjopen-2017-020235.reviewer_comments.pdf]

## PEER REVIEW HISTORY

BMJ Open publishes all reviews undertaken for accepted manuscripts. Reviewers are asked to complete a checklist review form (<http://bmjopen.bmj.com/site/about/resources/checklist.pdf>) and are provided with free text boxes to elaborate on their assessment. These free text comments are reproduced below.

## ARTICLE DETAILS

|                            |                                                                                                                                                                                                                                                                                                                                                                                       |
|----------------------------|---------------------------------------------------------------------------------------------------------------------------------------------------------------------------------------------------------------------------------------------------------------------------------------------------------------------------------------------------------------------------------------|
| <b>TITLE (PROVISIONAL)</b> | Delivering safe and effective test result communication, management and follow-up: A mixed-method study protocol                                                                                                                                                                                                                                                                      |
| <b>AUTHORS</b>             | Dahm, Maria; Georgiou, Andrew; Westbrook, Johanna; Greenfield, Prof David; Horvath, Andrea; Wakefield, Denis; Li, Ling; Hillman, Ken; Bolton, Patrick; Brown, Anthony; Jones, Graham; Herkes, Robert; Lindeman, Robert; Legg, Michael; Makeham, Meredith; Moses, Daniel; Badmus, Dauda; Campbell, Craig; Hardie, Rae-Anne; Li, Julie; McCaughey, Euan; Sezgin, Gorkem; Thomas, Judith |

This article was not externally reviewed at BMJ Open. Protocols that have been independently assessed prior to submission to BMJ Open are usually fast-tracked to publication on the grounds that further substantial changes will not be possible. This independent assessment will usually be external, independent review for both a substantial grant award from a non-commercial or government funder and ethics approval.
